# Supplementary material for: Quantification and visual inspection of adipic dihydrazide in textile using a xanthylium-based ratiometric fluorescent probe
Source: Royal Society of Chemistry journal article supplement (doi:10.1039/d4ay01164c), 2024-01-01
Supplement: d4ay01164c1.pdf [file d4ay01164c1.pdf]

*Electronic supplementary Information*

**Quantification and visual inspection of adipic dihydrazide in  
textile using a xanthonium-based ratiometric fluorescent probe**

Sifan Wang, Weijie Wu, Jiaqi Lv, Zicheng Li and Wencai Huang\*

School of Chemical Engineering, Sichuan University, Chengdu 610065, China.

Correspondence and requests for materials should be addressed to W. Huang (E-mail:  
hwc@scu.edu.cn).

**CONTENT**

|                                                                                                                                  |      |
|----------------------------------------------------------------------------------------------------------------------------------|------|
| <b>1. Structural characterizations of probe SH-Py</b> .....                                                                      | S-2  |
| <b>2. Color changes of SH-Py upon the addition of ADH in different solutions</b> ...                                             | S-4  |
| <b>3. Spectroscopic properties of SH-Py</b> .....                                                                                | S-5  |
| <b>4. Verification of sensing mechanism of SH-Py towards ADH</b> .....                                                           | S-7  |
| <b>5. Comparison of experimental results of different methods for the determination<br/>of ADH in real textile samples</b> ..... | S-9  |
| <b>6. AGREE assessment of the fluorescent method</b> .....                                                                       | S-10 |
| <b>7. Determination of LOD for acetyl hydrazine</b> .....                                                                        | S-11 |
| <b>8. Verification of sensing mechanism of SH-Py towards acetyl hydrazine</b> .....                                              | S-12 |

# 1. Structural characterizations of probe SH-Py

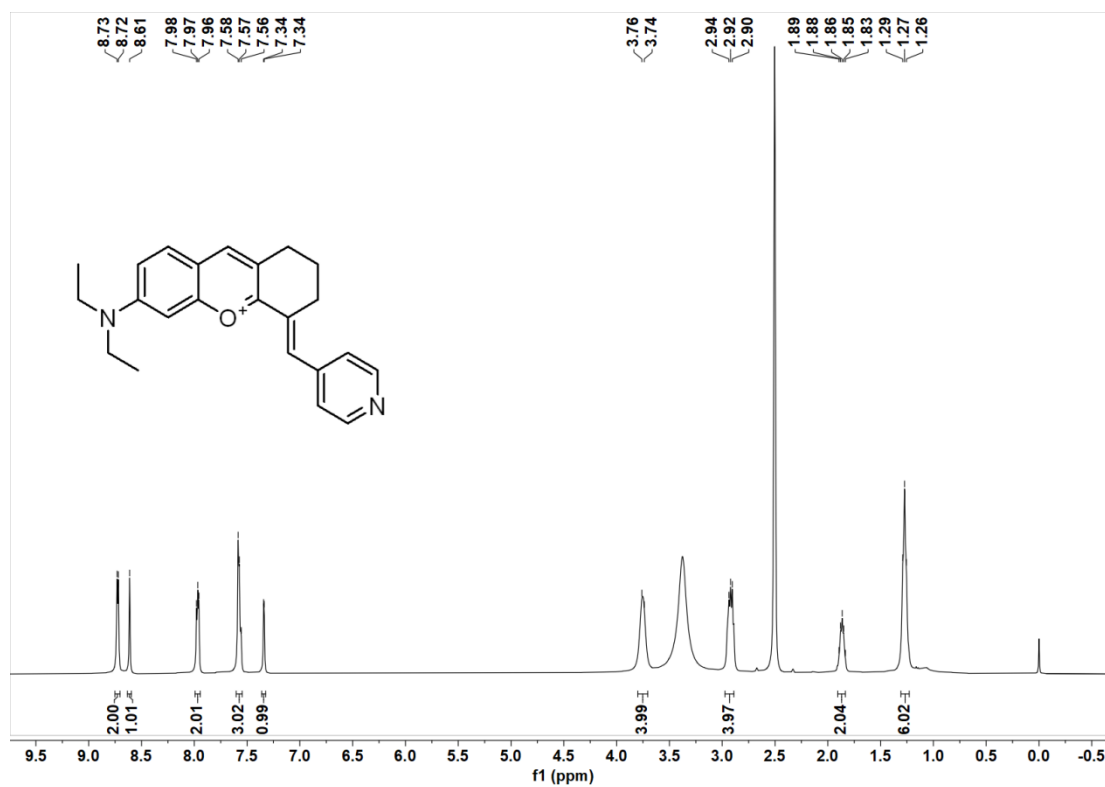

Fig. S1 <sup>1</sup>H NMR (400 MHz) spectrum of SH-Py in DMSO-*d*<sub>6</sub>.

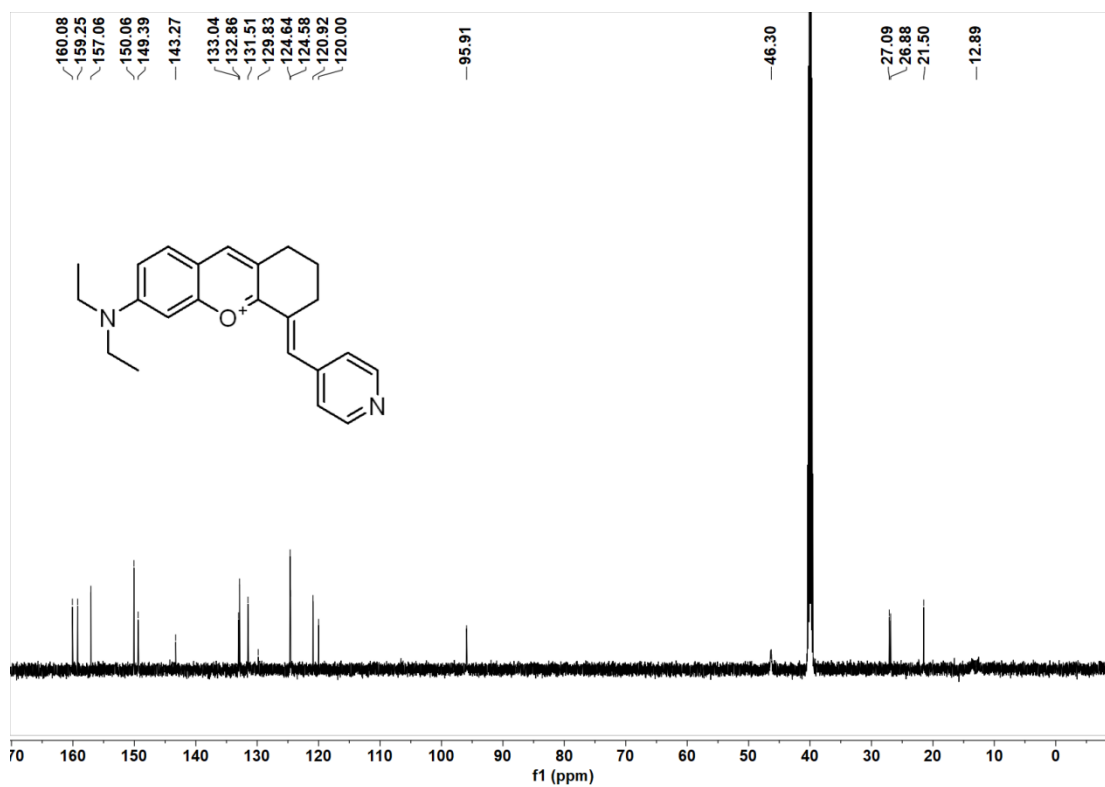

Fig. S2 <sup>13</sup>C NMR (100 MHz) spectrum of SH-Py in DMSO-*d*<sub>6</sub>.

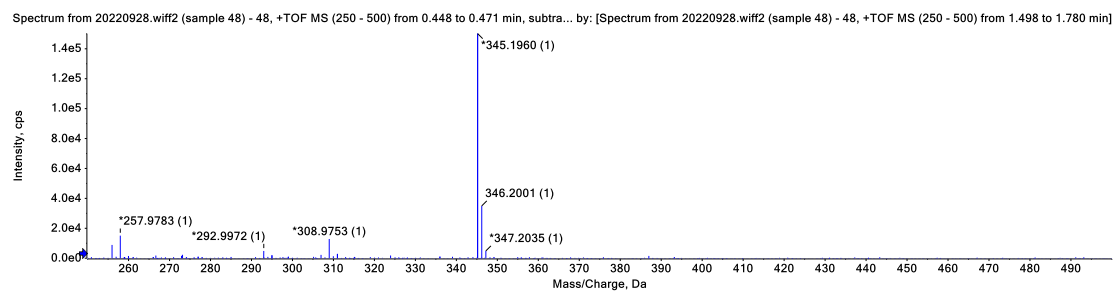

**Fig. S3** High resolution mass spectrometry of **SH-Py**.

## 2. Color changes of SH-Py upon the addition of ADH in different solutions

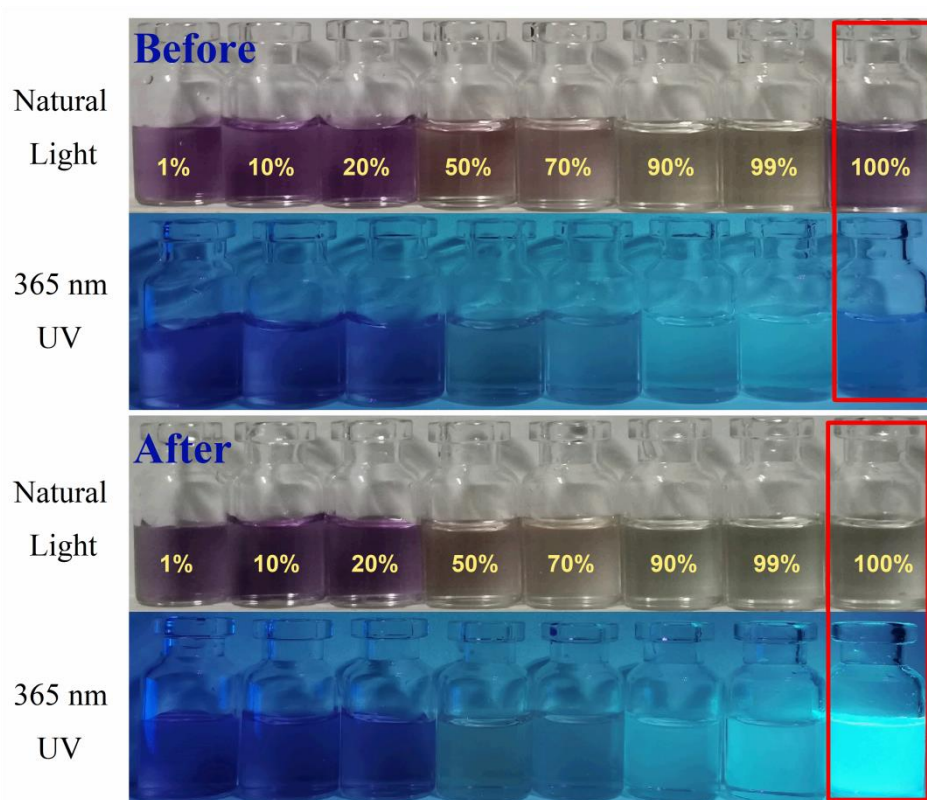

**Fig. S4** The color changes of SH-Py (10 μM) in solutions with increasing volume percentage (1%, 10%, 20%, 50%, 70%, 90%, 99%, 100%) of DMSO before and after the addition of ADH (500 μM).

### 3. Spectroscopic properties of SH-Py

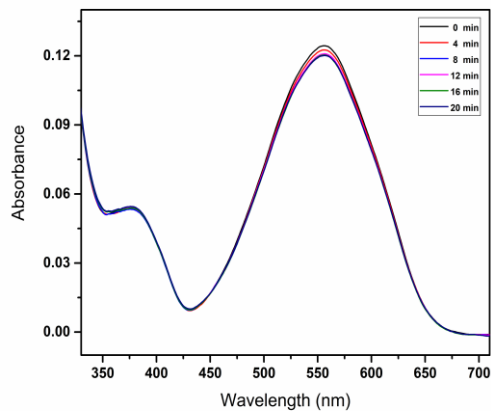

**Fig. S5** Time-dependent UV-vis absorption spectra of probe **SH-Py**.

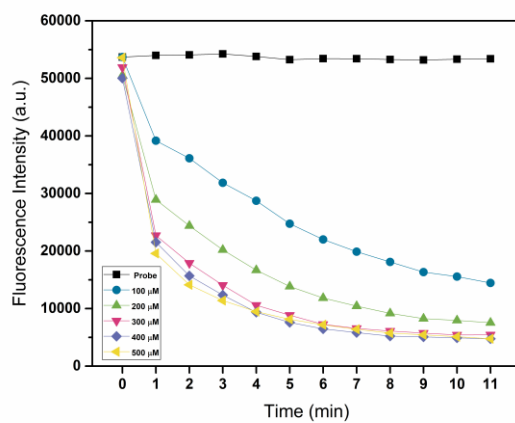

**Fig. S6** Time-dependent fluorescence intensities at 680 nm ( $\lambda_{\text{ex}} = 560$  nm, slit width (ex/em) = 20/20 nm) before and after the response of **SH-Py** (10  $\mu\text{M}$ ) to different concentrations (100  $\mu\text{M}$ , 200  $\mu\text{M}$ , 300  $\mu\text{M}$ , 400  $\mu\text{M}$ , 500  $\mu\text{M}$ ) of ADH.

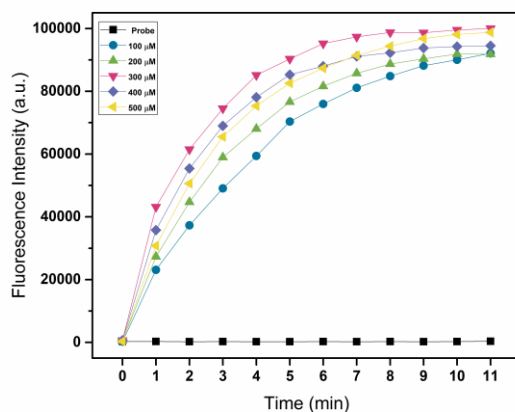

**Fig. S7** Time-dependent fluorescence intensities at 463 nm ( $\lambda_{\text{ex}} = 560$  nm, slit width (ex/em) = 20/20 nm) before and after the response of **SH-Py** (10  $\mu\text{M}$ ) to different concentrations (100  $\mu\text{M}$ , 200  $\mu\text{M}$ , 300  $\mu\text{M}$ , 400  $\mu\text{M}$ , 500  $\mu\text{M}$ ) of ADH.

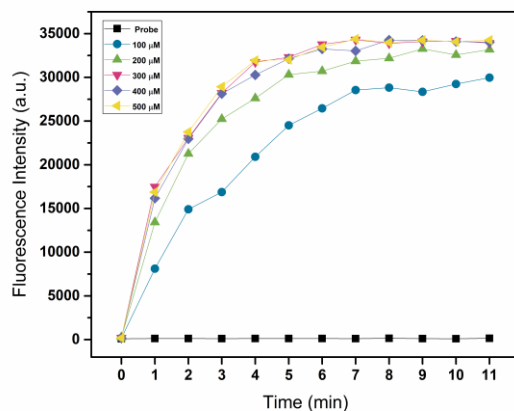

**Fig. S8** Time-dependent fluorescence intensities at 460 nm ( $\lambda_{\text{ex}} = 380$  nm, slit width (ex/em) = 3/3 nm) before and after the response of the probe **SH-Py** (10  $\mu\text{M}$ ) to different concentrations (100  $\mu\text{M}$ , 200  $\mu\text{M}$ , 300  $\mu\text{M}$ , 400  $\mu\text{M}$ , 500  $\mu\text{M}$ ) of ADH.

## 4. Verification of sensing mechanism

To the solution of probe **SH-Py** (0.89 mg, 1 mM) in DMSO (2 mL) was added the solution of ADH in DMSO (20  $\mu$ L) and the final concentration of ADH was 20 mM. Then, the mixture was subjected to HR-MS analysis after incubation at room temperature for 15 min.

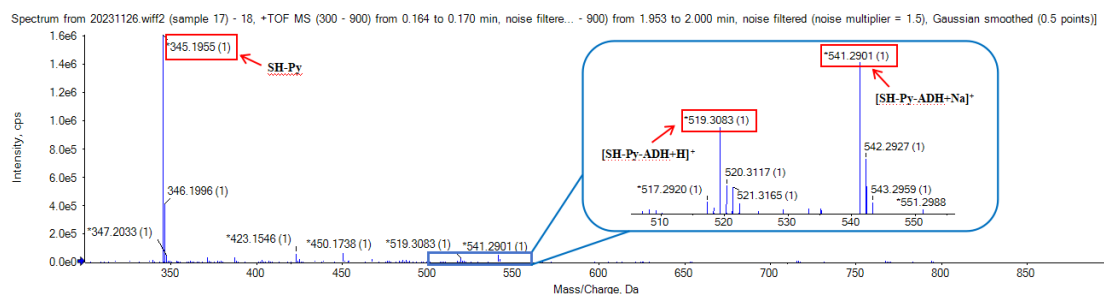

**Fig. S9** High resolution mass spectrometry of **SH-Py** after the addition of excess ADH.

### Preparation of addition product SH-Py-ADH

ADH (1044 mg, 6 mmol) was dissolved in DMSO (7 mL) with the aid of ultrasound treatment, then, **SH-Py** (134 mg, 0.3 mmol) was added in four portions. After the mixture was stirred at 30°C for 30 min, ethyl acetate (30 mL) and brine (7 mL) were added and the mixture was stirred at room temperature for 5 min. The organic layer separated was further washed with water, dried with sodium sulfate, and concentrated under reduced pressure to yield yellow crude product (110 mg). Yellow brown solid (35 mg, 22.5%) was finally obtained by chromatograph on aluminium oxide (neutral, 100 - 200 mesh) with ethyl acetate/ methanol (30/1, v/v) as the eluent. <sup>1</sup>H NMR (400 MHz, DMSO-*d*<sub>6</sub>):  $\delta$  (ppm) 9.16 (d,  $J$  = 27.6 Hz, 1H), 8.47 (d,  $J$  = 4.6 Hz, 2H), 7.42 – 7.36 (m, 2H), 6.80 (d,  $J$  = 8.3 Hz, 1H), 6.19 (s, 2H), 6.10 (s, 1H), 5.38 (s, 1H), 5.20 (s, 1H), 3.31 – 3.18 (m, 4H), 2.31 (d,  $J$  = 11.0 Hz, 4H), 1.99 (d,  $J$  = 1.9 Hz, 2H), 1.84 (d,  $J$  = 5.6 Hz, 2H), 1.59 (s, 2H), 1.40 (s, 2H), 1.30 – 1.13 (m, 4H), 1.07 (t,  $J$  = 5.8 Hz, 6H).

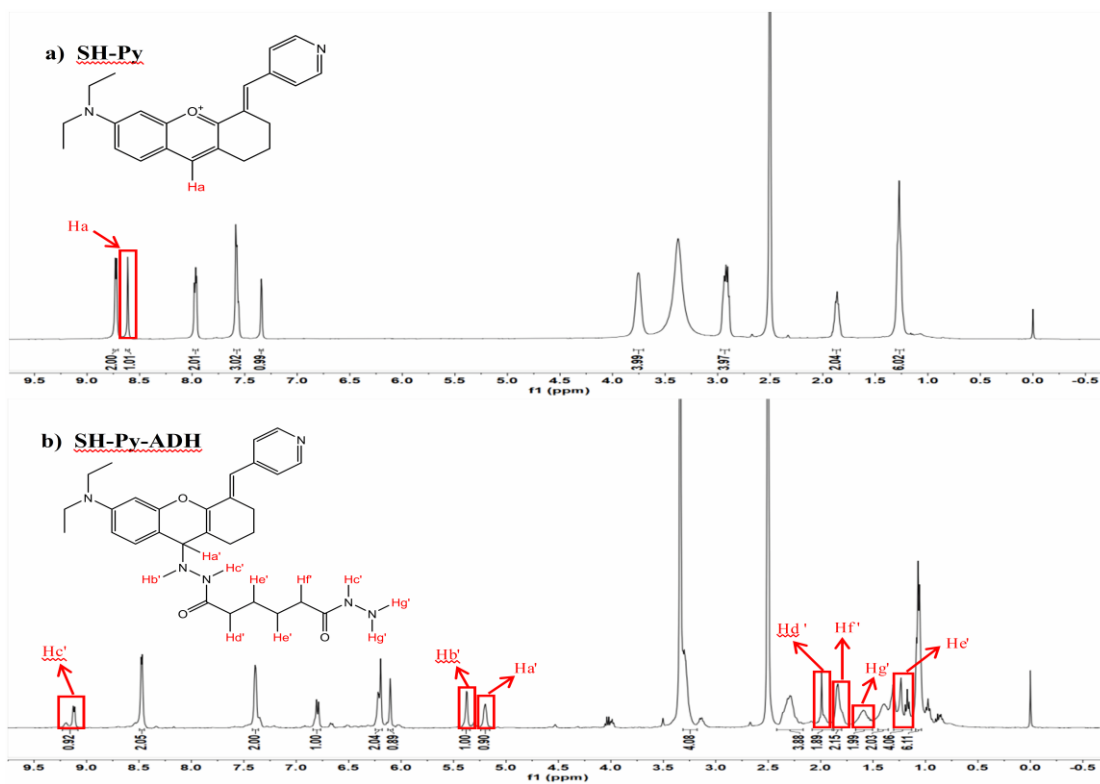

**Fig. S10** <sup>1</sup>H-NMR spectrum of probe SH-Py before (a) and after (b) the reaction with ADH.



## 5. Comparison of experimental results of different methods for the determination of ADH in real textile samples

**Table S1** Comparison of experimental results of different methods for the determination of ADH in real textile samples.

| Method            | Solvent | Analysis time (min) | Linearity range | Recovery (%) | RSD (%) | Reference |
|-------------------|---------|---------------------|-----------------|--------------|---------|-----------|
| HPLC-MS/MS        | Water   | 5                   | 0.05-2 mg/L     | 85-100%      | <10%    | [1]       |
| Fluorescent probe | DMSO    | 10                  | 0-300 $\mu$ M   | 97.7-101.1%  | <1.1%   | This work |

### Reference

[1] J. Tao, Z. Lin, H. Zhang, Z. Wu and H. Cao, *RSC Adv.*, 2018, **8**, 2915-2921.

## 6. AGREE assessment of the fluorescent method

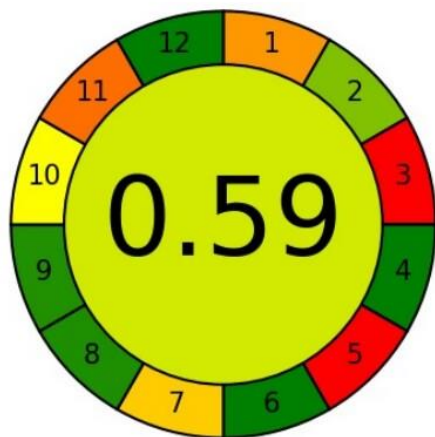

1. Sample treatment
2. Sample amount
3. Device positioning
4. Integration of processes
5. Automation, miniaturization
6. Derivatization
7. Waste
8. Analysis throughput
9. Energy consumption
10. Source of reagents
11. Toxicity
12. Operator's safety

**Fig. S11** AGREE assessment of the fluorescent method for the quantification of ADH in textile sample.

## 7. Determination of LOD for acetyl hydrazine

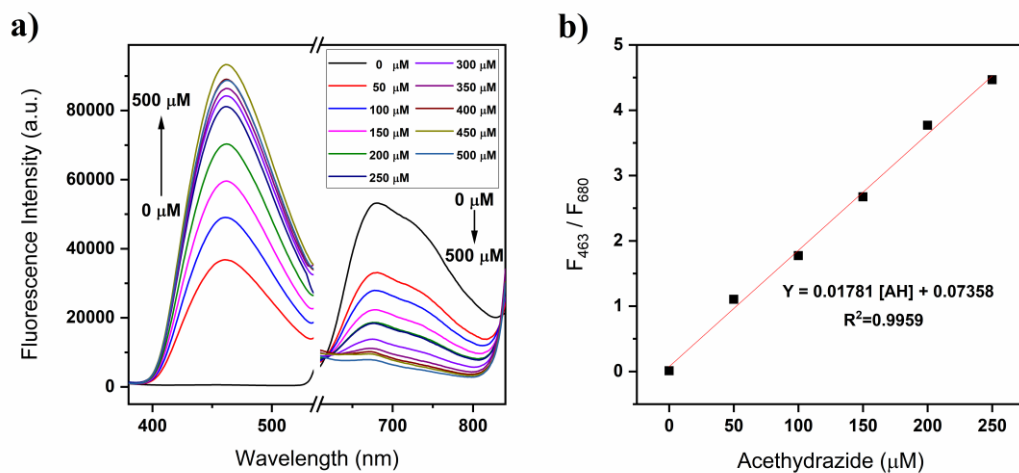

**Fig. S12** (a) Changes of fluorescence spectra of SH-Py (10  $\mu\text{M}$ ) upon the addition of increasing concentrations of acetyl hydrazine (0-500  $\mu\text{M}$ ). (b) Plot of the linear relationship between  $F_{463}/F_{680}$  of SH-Py and the concentration of acetyl hydrazine (0-250  $\mu\text{M}$ ).  $\lambda_{\text{ex}} = 560 \text{ nm}$ , slit width (ex/em) = 20/20 nm.

## 8. Verification of sensing mechanism of SH-Py towards acetyl hydrazine

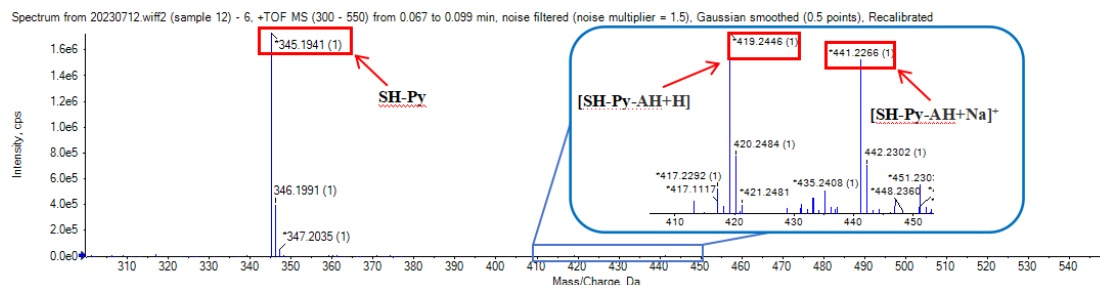

Fig. S13 High resolution mass spectrometry of SH-Py after the addition of excess acetyl hydrazine.

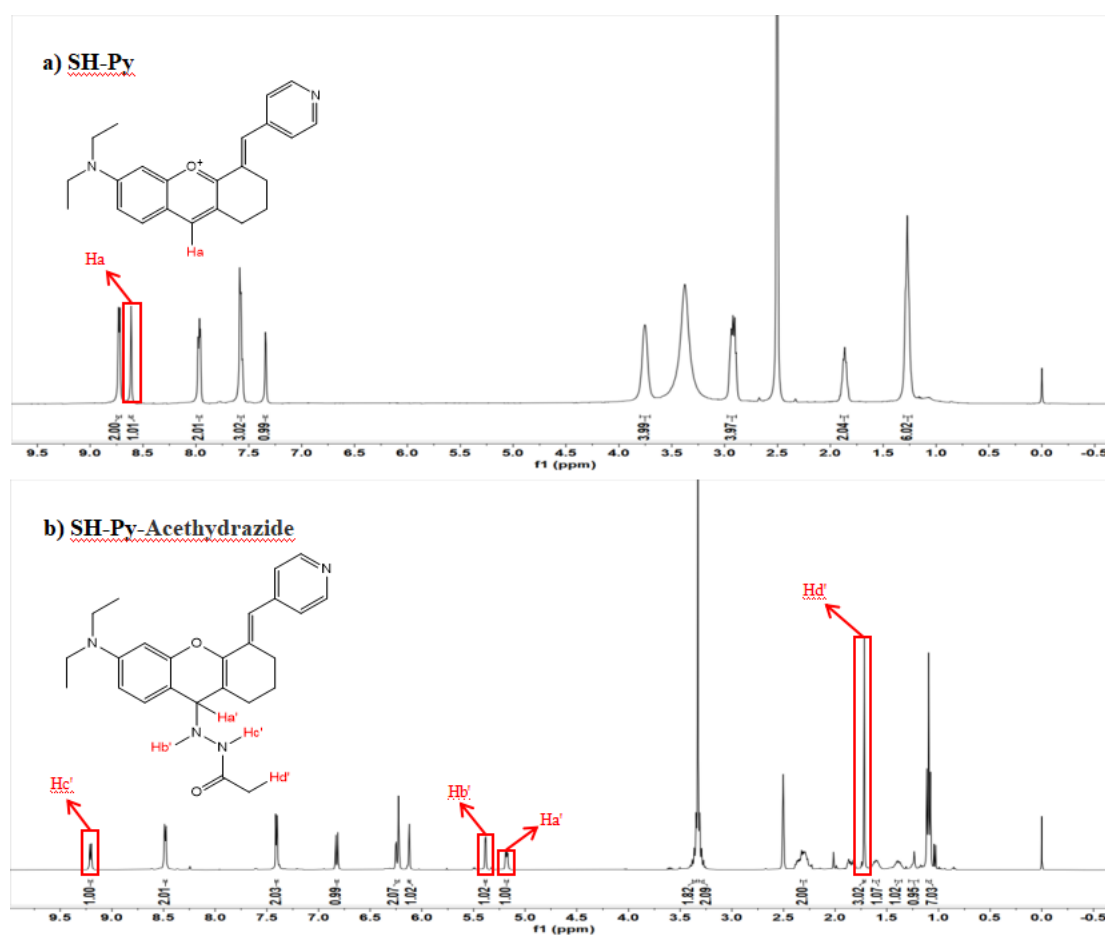

Fig. S14  $^1\text{H-NMR}$  spectrum of probe SH-Py before (a) and after (b) the reaction with acetyl hydrazine.
